# Supplementary material for: One-pot synthesis of two new copper(i) coordination polymers: in situ formation of different ligands from 4-aminotriazole
Source: Royal Society of Chemistry journal article supplement (doi:10.1039/b821491c), 2009-01-01
Supplement: b821491c.pdf [file b821491c.pdf]

## One-Pot Synthesis of Two New Copper(I) Coordination Polymers: In Situ Formation of Different Ligands from 4-aminotriazole

Zhen-Guo Zhao,<sup>a</sup> Rong-Min Yu,<sup>a</sup> Xiao-Yuan Wu,<sup>a</sup> Qi-Sheng Zhang,<sup>a</sup> Yi-Ming Xie,<sup>a</sup> Fei Wang,<sup>a</sup> Seik Weng Ng,<sup>b</sup> and Can-Zhong Lu<sup>\*a</sup>

Received (in XXX, XXX) Xth XXXXXXXXXX 200X, Accepted Xth XXXXXXXXXX 200X

First published on the web Xth XXXXXXXXXX 200X

DOI: 10.1039/b000000x

<sup>a</sup> State Key Laboratory of Structure Chemistry, Fujian Institute of Research on the Structure of Matter, Chinese Academy of Sciences, Fuzhou, Fujian 350002, P. R. China

<sup>b</sup> Graduate School of Chinese Academy of Sciences, Beijing 100039, P. R. China.

\*The corresponding author, Fax: (+86)- 591-83714946; Tel: (+86)- 591-83705794; E-mail: czlu@fjirsm.ac.cn

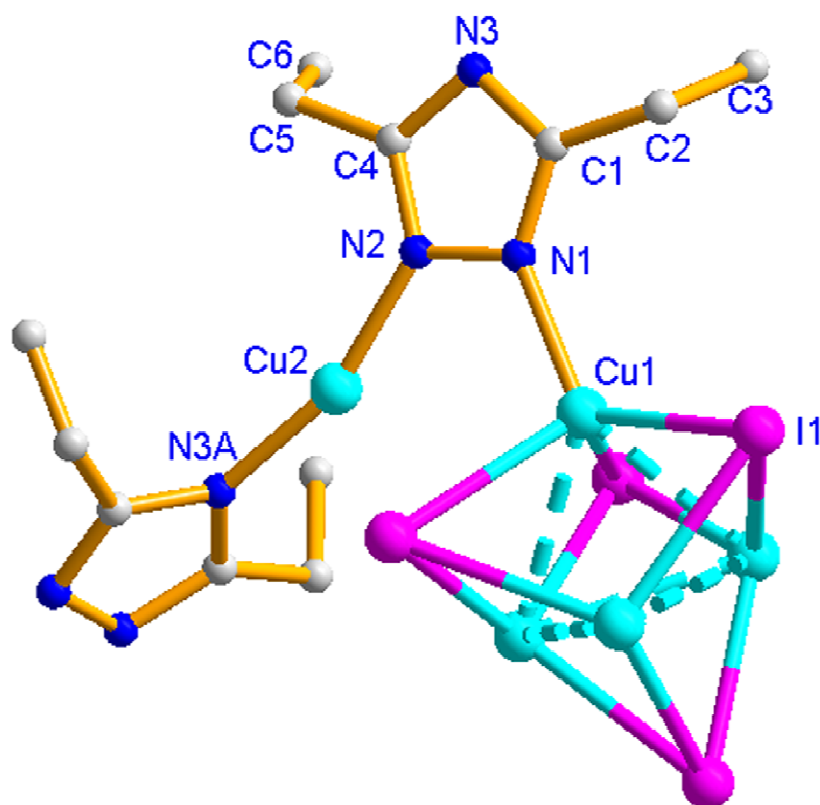

**Fig. S1** The coordination environments of Cu1 and Cu2 atoms in **2**. Symmetry codes: (A)  $-x+0, -y+1/2, z+0$

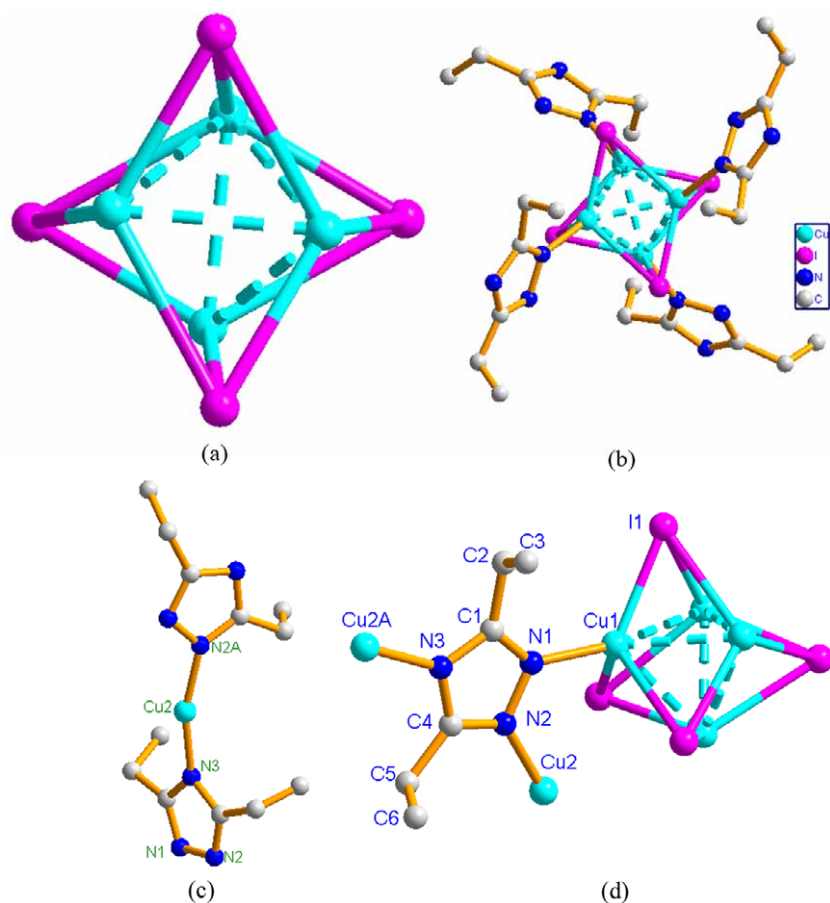

**Fig. S2** The coordination geometries of Cu<sub>4</sub>I<sub>4</sub> unit, Cu1, Cu2, dtz in 2.

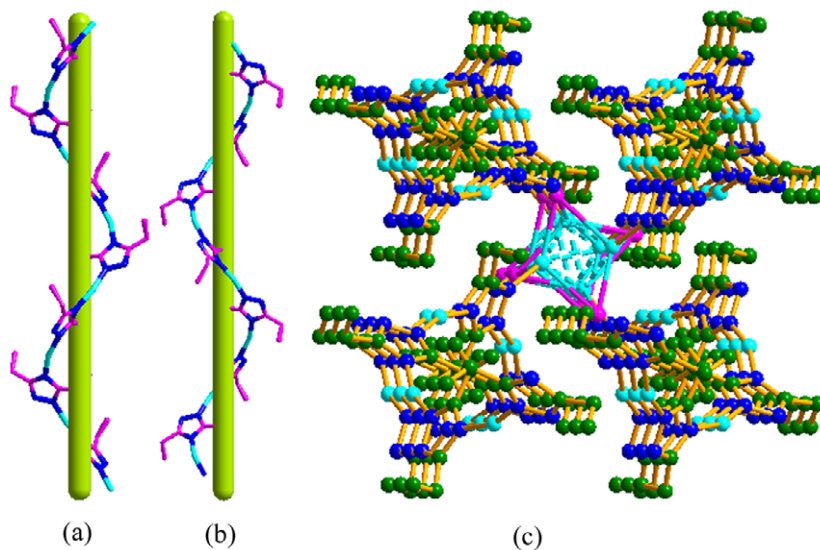

**Fig. S3** (a) View of the right-handed helices. (b) View of the left-handed helices. (c) Ball and Stick view of four helices with opposite chiralities.

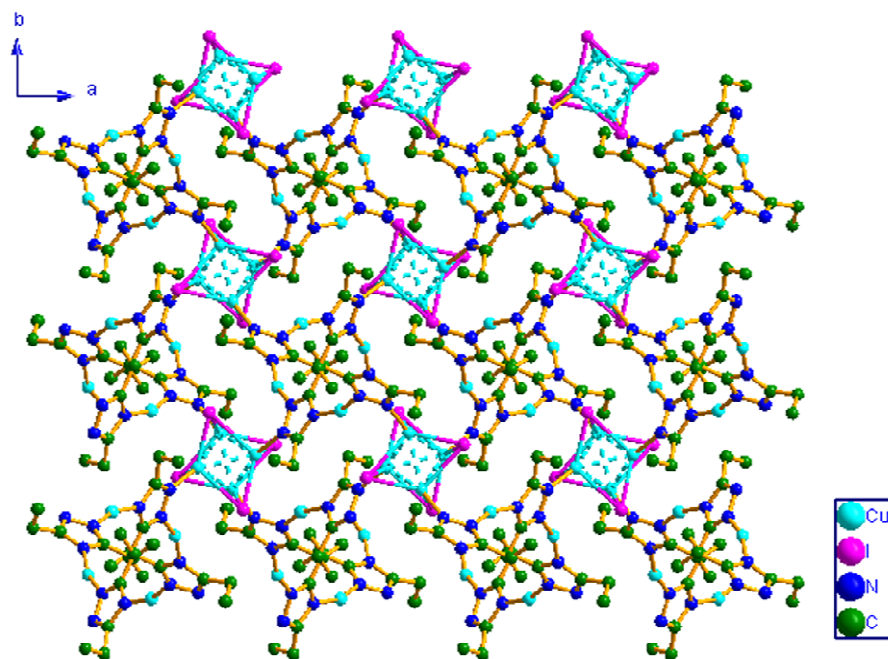

Fig. S4 View of the 3D network down the *c*-axis for 2

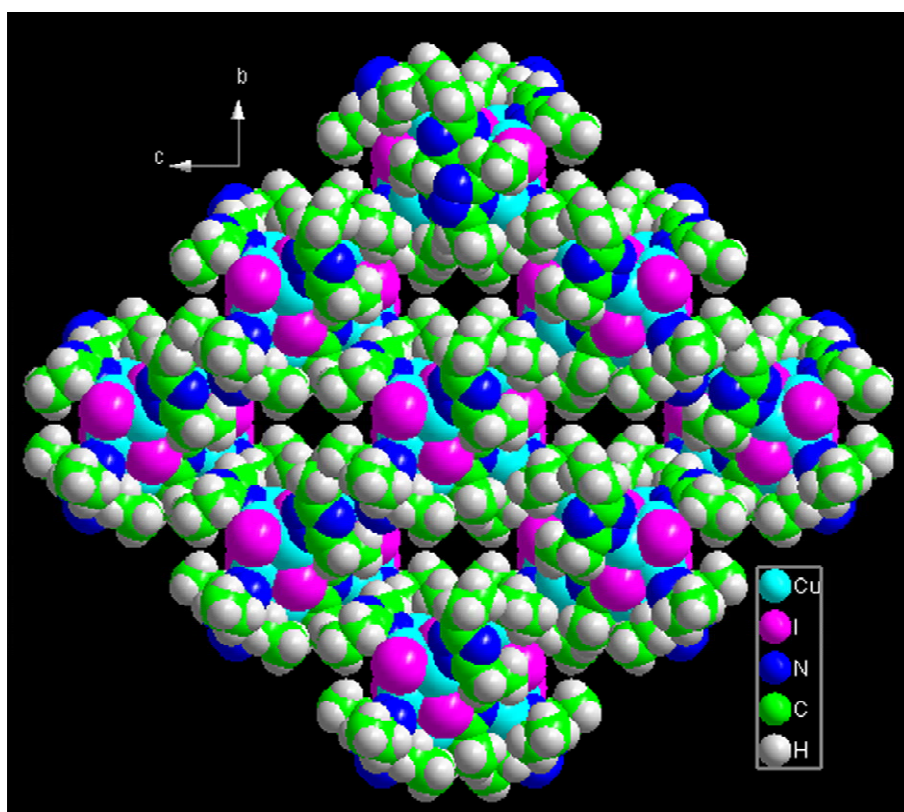

Fig. S5 View of the 3D network and space filling model of the channel structures along the *a* axis

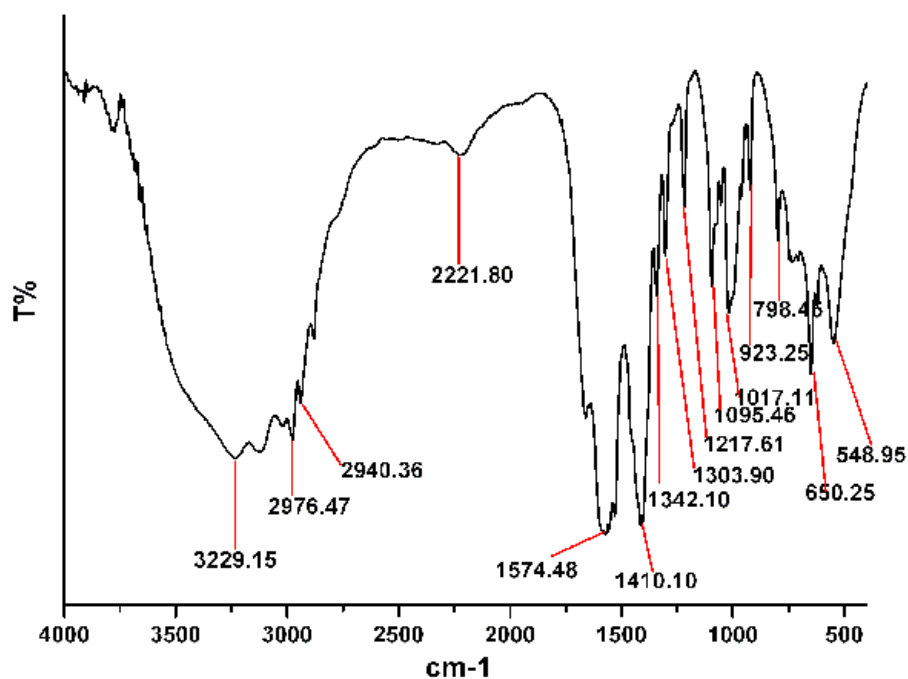

Fig. S6 The IR spectrum of 3,5-diethyl-4-amino-triazole.

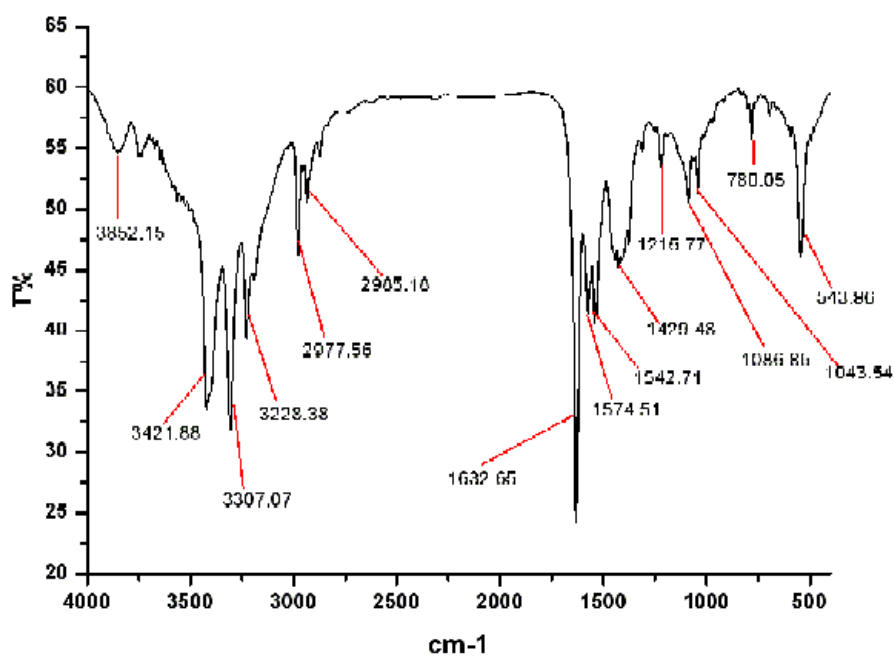

Fig. S7 The IR spectrum of 1

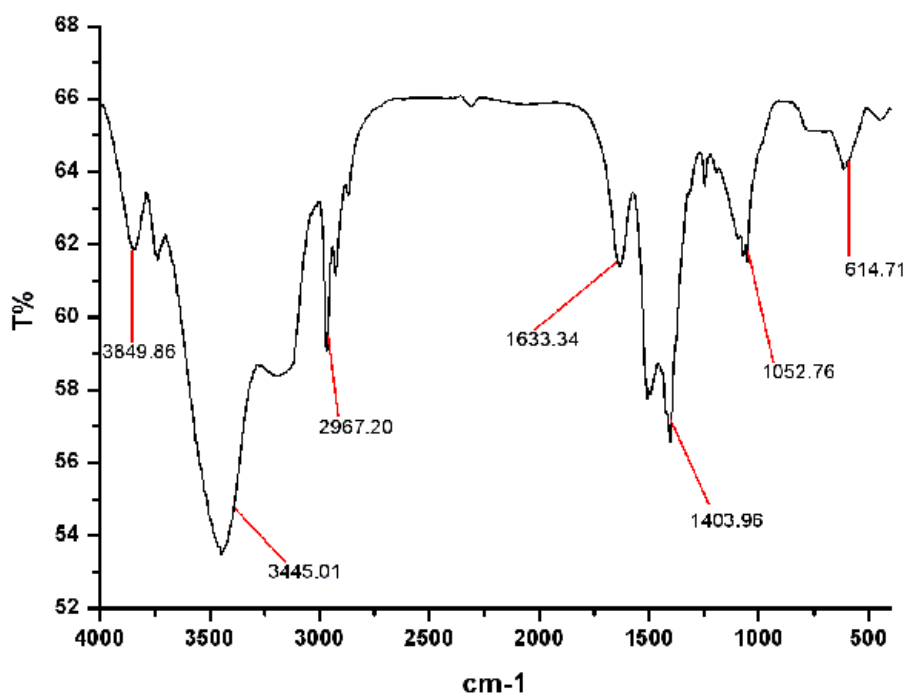

Fig. S8 The IR spectrum of 2

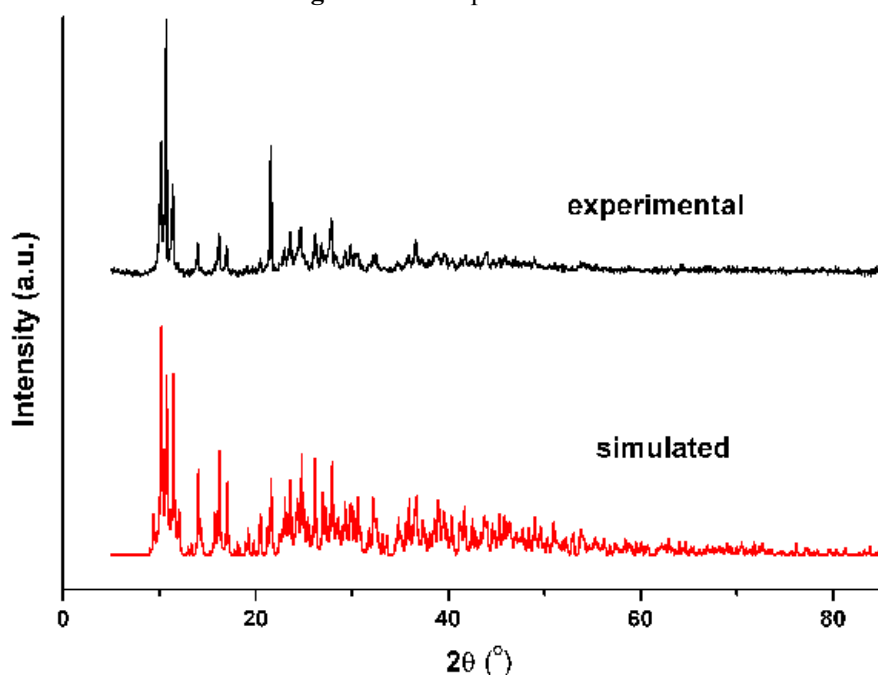

Fig. S9 PXR D patterns for 1

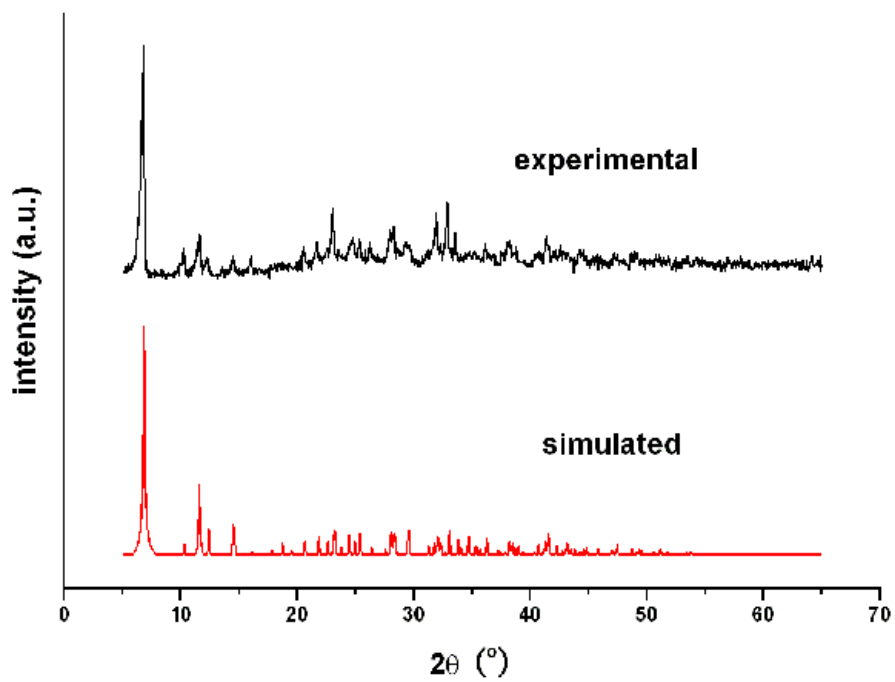

Fig. S10 PXR D patterns for 2

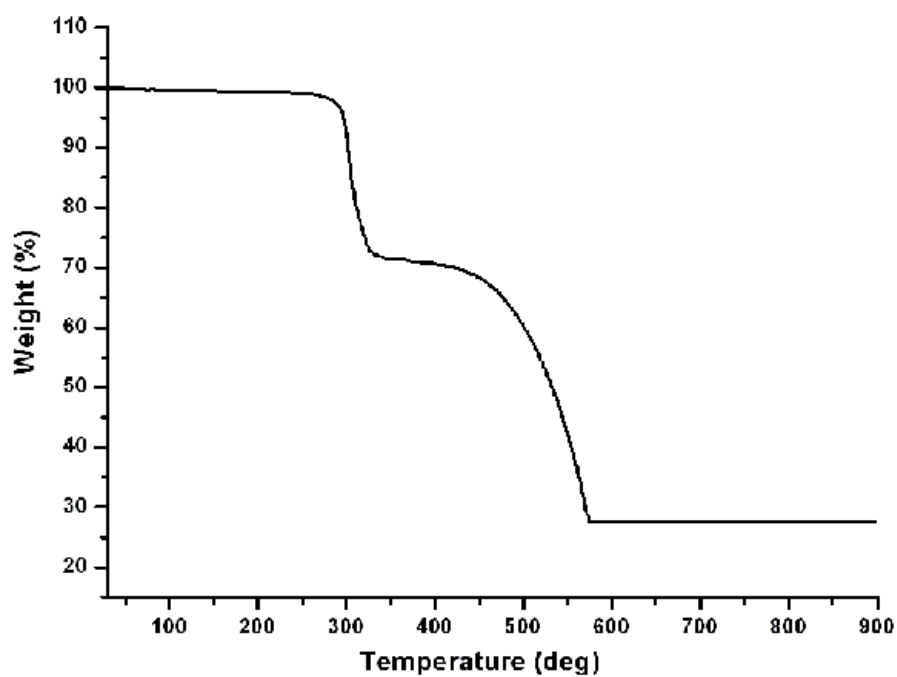

Fig. S11 The TGA plot for 1

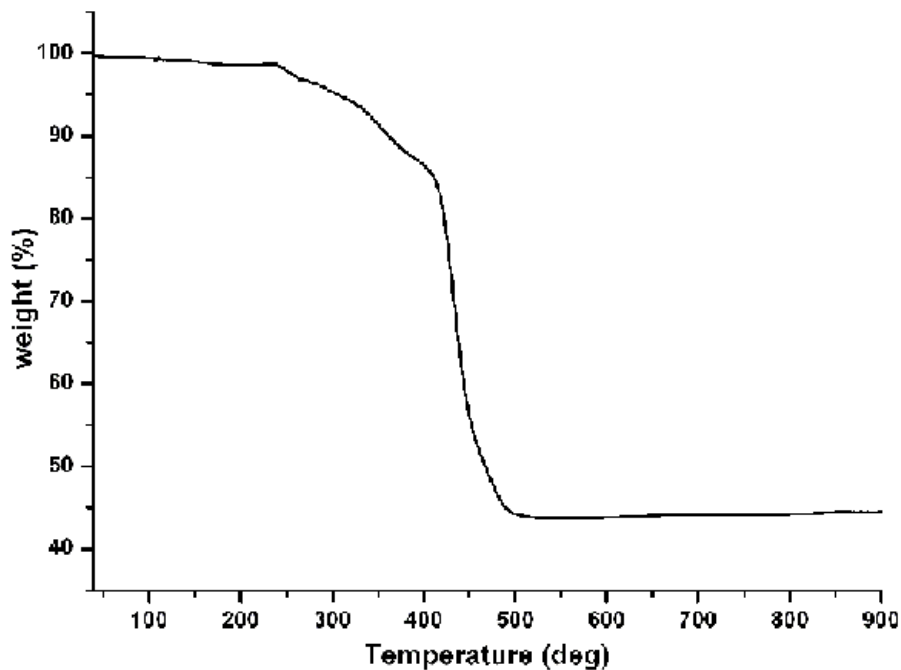

Fig. S12 The TGA plot for 2

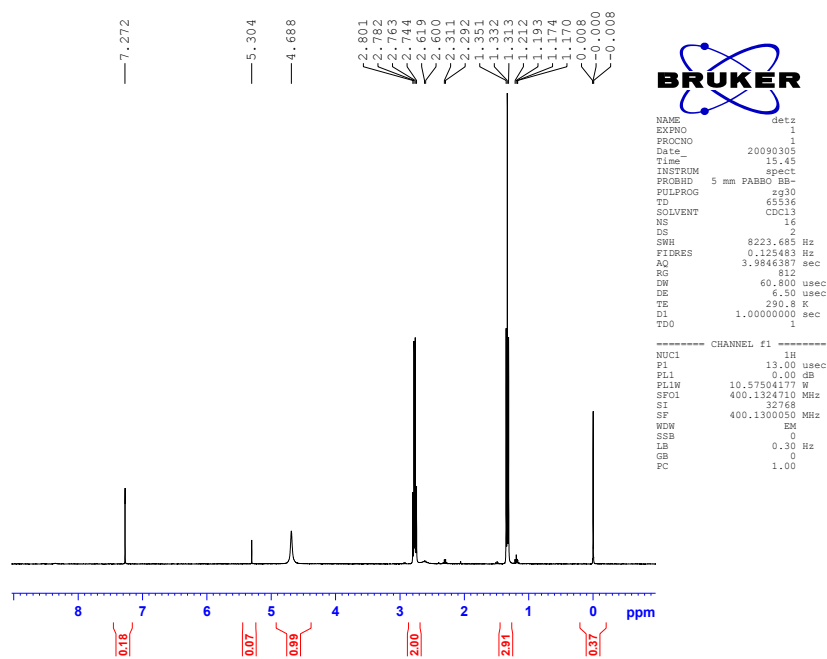

Fig. S13  $^1\text{H}$  NMR spectrum of 4-amino-3,5-diethyl-1,2,4-triazole.  $^1\text{H}$  NMR ( $\text{CDCl}_3$ ,  $\delta$ ppm) for 4-amino-3,5-diethyl-1,2,4-triazole: 4.688 (s, 2H,  $\text{NH}_2$ ), 2.801-2.744 (m, 4H,  $\text{CH}_2$ ), 1.332 (t, 6H,  $J_{\text{H-H}} = 7.6$  Hz,  $\text{CH}_3$ )
